## The correlation between locomotor performance and hindlimb kinematics during burst locomotion in the Florida scrub lizard, *Sceloporus woodi*

Eric McElroy, Kristen L. Archambeau and Lance D. McBrayer

10.1242/jeb.096776

There was an error published in *J. Exp. Biol.* **215**, 442-453.

In Table 2, the heading for columns 7 and 8 should have read 'Combined' rather than 'Stride 3'. The correct version of the table is given below.

Table 2. Results of the hierarchical partitioning analysis

|                               | Stride 1    |          |                          |          | Stride 3    |          |             |          | Combined           |          |                   |          |
|-------------------------------|-------------|----------|--------------------------|----------|-------------|----------|-------------|----------|--------------------|----------|-------------------|----------|
|                               | Final speed |          | Peak mass-specific power |          | Final speed |          | Final speed |          | Total acceleration |          | Peak acceleration |          |
|                               | <i>I</i>    | <i>J</i> | <i>I</i>                 | <i>J</i> | <i>I</i>    | <i>J</i> | <i>I</i>    | <i>J</i> | <i>I</i>           | <i>J</i> | <i>I</i>          | <i>J</i> |
| Min. hip $\Theta$             | –           | –        | 0.12                     | 0.11     | 0.06        | 0.22     | –           | –        | –                  | –        | –                 | –        |
| Min. knee $\Theta$            | –           | –        | –                        | –        | 0.15        | 0.28     | –           | –        | 0.11               | 0.17     | 0.10              | 0.17     |
| Min. ankle $\Theta$           | 0.06        | –0.06    | –                        | –        | 0.10        | 0.30     | 0.10        | –0.05    | –                  | –        | –                 | –        |
| Min. MTP $\Theta$             | 0.15        | 0.20     | –                        | –        | 0.05        | 0.17     | 0.10        | 0.09     | –                  | –        | –                 | –        |
| Min. rotation $\Theta$        | –           | –        | –                        | –        | –           | –        | –           | –        | 0.14               | 0.22     | 0.15              | 0.17     |
| Total $\Theta$ swept hip      | –           | –        | –                        | –        | 0.09        | 0.16     | –           | –        | –                  | –        | –                 | –        |
| Total $\Theta$ swept knee     | –           | –        | –                        | –        | –           | –        | –           | –        | 0.08               | 0.17     | 0.07              | 0.20     |
| Total $\Theta$ swept ankle    | 0.10        | –0.04    | –                        | –        | –           | –        | 0.04        | –0.03    | 0.11               | 0.18     | 0.08              | 0.18     |
| Total $\Theta$ swept MTP      | 0.14        | 0.28     | –                        | –        | 0.08        | 0.20     | 0.07        | 0.11     | –                  | –        | –                 | –        |
| Total $\Theta$ swept rotation | –           | –        | 0.14                     | 0.16     | –           | –        | –           | –        | 0.07               | 0.15     | –                 | –        |
| $\Theta V_{\max}$ hip         | –           | –        | –                        | –        | –           | –        | –           | –        | 0.10               | 0.02     | –                 | –        |
| $\Theta V_{\max}$ knee        | –           | –        | –                        | –        | –           | –        | –           | –        | –                  | –        | 0.07              | 0.15     |
| $\Theta V_{\max}$ ankle       | –           | –        | –                        | –        | 0.16        | 0.04     | –           | –        | –                  | –        | –                 | –        |
| $\Theta V_{\max}$ MTP         | 0.10        | 0.24     | 0.13                     | 0.09     | 0.04        | 0.18     | –           | –        | –                  | –        | –                 | –        |
| $\Theta V_{\max}$ rotation    | 0.13        | 0.17     | –                        | –        | 0.17        | 0.36     | 0.15        | 0.10     | –                  | –        | –                 | –        |

Only variables with a significant simple Pearson correlation, or 0.75 posterior probability in Bayesian model averaging, were included in the partitioning analysis. *I* is the variance explained by a predictor variable that is independent of the variance explained by other predictors (i.e. not influenced by collinearity) and is always a positive number or zero. *J* is the variance explained by collinearity between predictors. A positive *J* suggests that collinearity has inflated the simple correlation between the predictor and response, whereas a negative *J* suggests that collinearity has suppressed the simple correlation.

The square root of the sum of *I* and *J* for each variable is the absolute value of its simple Pearson correlation.

MTP, metatarsophalangeal;  $\Theta$ , angle;  $\Theta V_{\max}$ , maximum instantaneous angular velocity.

We apologise to authors and readers for any inconvenience this error may have caused.
